# Supplementary material for: Anemia and Diabetic Kidney Disease Had Joint Effect on Diabetic Retinopathy Among Patients With Type 2 Diabetes
Source: PubMed Central journal article supplement — Invest Ophthalmol Vis Sci. 2020 Dec 22;61(14):25. doi: 10.1167/iovs.61.14.25 (PMC7757636; doi:10.1167/iovs.61.14.25), 2020-12-22
Supplement: iovs-61-14-25_s001.pdf [file iovs-61-14-25_s001.pdf]

## SUPPLEMENT

### *Definition of diabetic kidney disease (DKD) severity*

| Severity of DKD by eGFR and Albuminuria<br>Categories: KDIGO 2012     |                                  |         | UACR categories (mg/g) Description and range |                      |                    |
|-----------------------------------------------------------------------|----------------------------------|---------|----------------------------------------------|----------------------|--------------------|
|                                                                       |                                  |         | Normal to mildly increased                   | Moderately increased | Severely increased |
|                                                                       |                                  |         | < 30                                         | 30-300               | > 300              |
| eGFR categories (ml/min/1.73m <sup>2</sup> )<br>Description and range | Normal or high                   | ≥ 90    |                                              |                      |                    |
|                                                                       | Mildly decreased                 | 60-89.9 |                                              |                      |                    |
|                                                                       | Mildly to moderately decreased   | 45-59.9 |                                              |                      |                    |
|                                                                       | Moderately to severely decreased | 30-44.9 |                                              |                      |                    |
|                                                                       | Severely decreased               | 15-29.9 |                                              |                      |                    |
|                                                                       | Kidney failure                   | < 15    |                                              |                      |                    |

Green: low risk (if no other markers of kidney disease, no CKD); Yellow: moderately increased risk; Orange: high risk; Red, very high risk

**Supplementary Figure 1.** Severity of DKD by eGFR and UACR categories.

### ***Multiple imputation***

Before multiple imputation, UACR was log-transformed to achieve normality. Using multiple imputation, we generated 5 independently imputed datasets. The density curves below demonstrated the distribution of BMI and UACR in the five imputation datasets were qualitatively similar to those in the observed data (Supplementary Figure 2). The red curve is the density curve of each imputed dataset, and the blue curve is the density curve of the observed data.

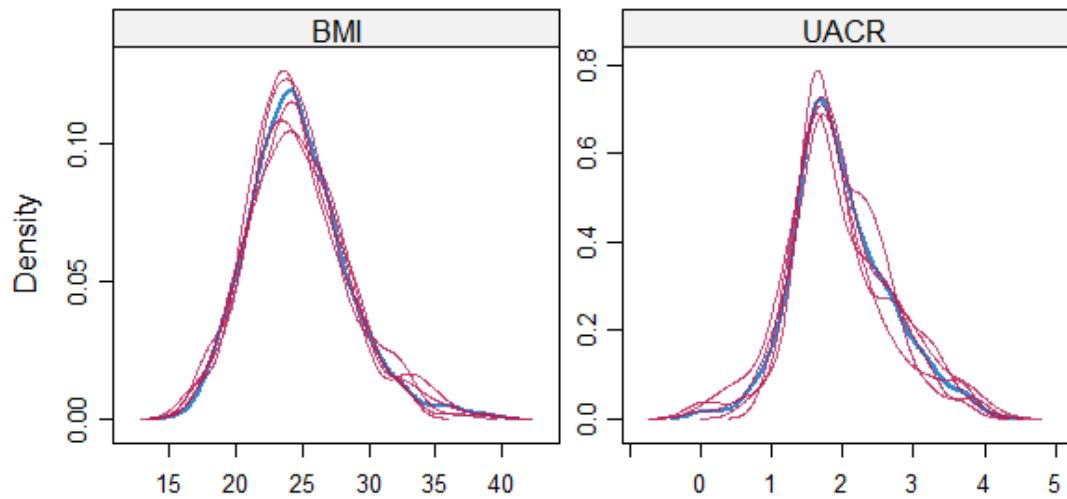

**Supplementary Figure 2.** Density curves for BMI and UACR.

*Path analysis*

**Supplementary Table 1.** Associations between path variables in the original model (model 1).

| Variables          | Standardized estimate | standard errors | Z-statistic | P-value            |
|--------------------|-----------------------|-----------------|-------------|--------------------|
| <b>DR</b>          |                       |                 |             |                    |
| <b>Hb</b>          | -0.2302               | 0.0315          | -7.3079     | <b>&lt; 0.0001</b> |
| <b>UACR</b>        | 0.1809                | 0.0316          | 5.7200      | <b>&lt; 0.0001</b> |
| <b>eGFR</b>        | 0.0058                | 0.0340          | 0.1703      | 0.8647             |
| <b>HbA1c</b>       | 0.0622                | 0.0343          | 1.8130      | 0.0698             |
| <b>MAP</b>         | 0.1766                | 0.0307          | 5.7574      | <b>&lt; 0.0001</b> |
| <b>Hb</b>          | ~                     |                 |             |                    |
| <b>UACR</b>        | -0.1285               | 0.0249          | -5.1636     | <b>&lt; 0.0001</b> |
| <b>eGFR</b>        | 0.3052                | 0.0246          | 12.4051     | <b>&lt; 0.0001</b> |
| <b>HbA1c</b>       | 0.0794                | 0.0260          | 3.0532      | <b>0.0023</b>      |
| <b>UACR</b>        | ~                     |                 |             |                    |
| <b>HbA1c</b>       | 0.0937                | 0.0266          | 3.5295      | <b>0.0004</b>      |
| <b>MAP</b>         | 0.1426                | 0.0257          | 5.5441      | <b>&lt; 0.0001</b> |
| <b>eGFR</b>        | ~                     |                 |             |                    |
| <b>HbA1c</b>       | 0.2179                | 0.0242          | 9.0062      | <b>&lt; 0.0001</b> |
| <b>MAP</b>         | -0.0050               | 0.0262          | -0.1894     | 0.8497             |
| <b>eGFR ~ UACR</b> | -0.3422               | 0.0226          | -15.1737    | <b>&lt; 0.0001</b> |

Shown were the dependent variables with their associated independent variables indented beneath them. Standardized estimates expressed this increase in standardized units of measurement. Standardized estimates indicated these changes in standardized units of measurement, facilitating comparisons of the size of the association across different scales of measurement. Abbreviation: DR = diabetic retinopathy (categorical variable); MAP = mean arterial pressure; HbA1c = glycated hemoglobin; eGFR = estimated glomerular filtration rate; UACR = urine albumin-to-creatinine ratio.

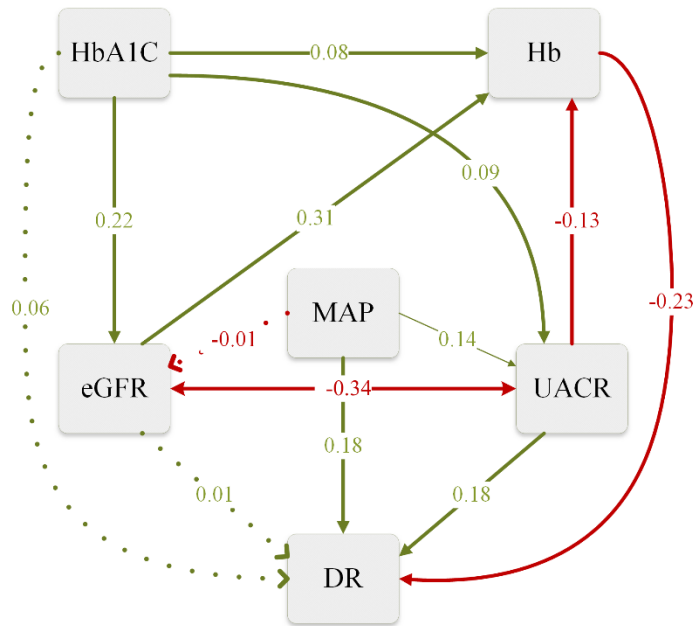

**Supplementary Figure 3.** Path diagram of the original model (model 1). Abbreviation: DR = diabetic retinopathy (categorical variable); MAP = mean arterial pressure; HbA1c = glycated hemoglobin; eGFR = estimated glomerular filtration rate; UACR = urine albumin-to-creatinine ratio. Green arrows indicate significant positive effects and red arrows significant negative effects. One-headed arrows represent a causal effect of one variable on another (i.e., a path). Double-headed arrows link variables with correlated errors. Dashed arrows indicate the path is not significant ( $P > 0.05$ ). The values shown were standardized regression coefficient.

**Supplementary Table 2.** Associations between path variables in the reduced model (model 2).

| Variables          | Standardized estimate | standard errors | Z-statistic | P-value         |
|--------------------|-----------------------|-----------------|-------------|-----------------|
| <b>DR</b>          |                       |                 |             |                 |
| <b>Hb</b>          | -0.2173               | 0.0311          | -6.9788     | < <b>0.0001</b> |
| <b>UACR</b>        | 0.1876                | 0.0300          | 6.2563      | < <b>0.0001</b> |
| <b>MAP</b>         | 0.1762                | 0.0308          | 5.7173      | < <b>0.0001</b> |
| <b>Hb</b>          |                       |                 |             |                 |
| <b>UACR</b>        | -0.1288               | 0.0252          | -5.1115     | < <b>0.0001</b> |
| <b>eGFR</b>        | 0.3055                | 0.0248          | 12.3042     | < <b>0.0001</b> |
| <b>HbA1c</b>       | 0.0725                | 0.0263          | 2.7603      | <b>0.0058</b>   |
| <b>UACR</b>        |                       |                 |             |                 |
| <b>HbA1c</b>       | 0.1003                | 0.0268          | 3.7368      | <b>0.0002</b>   |
| <b>MAP</b>         | 0.1428                | 0.0262          | 5.4598      | < <b>0.0001</b> |
| <b>eGFR</b>        |                       |                 |             |                 |
| <b>HbA1c</b>       | 0.2179                | 0.0242          | 9.0062      | < <b>0.0001</b> |
| <b>eGFR ~ UACR</b> | -0.3418               | 0.0227          | -15.0659    | < <b>0.0001</b> |

Shown were the dependent variables with their associated independent variables indented beneath them. Standardized estimates expressed this increase in standardized units of measurement. Standardized estimates indicated these changes in standardized units of measurement, facilitating comparisons of the size of the association across different scales of measurement. Abbreviation: DR = diabetic retinopathy (categorical variable); MAP = mean arterial pressure; HbA1c = glycated hemoglobin; eGFR = estimated glomerular filtration rate; UACR = urine albumin-to-creatinine ratio.

**Supplementary Table 3.** Model fit indices for the reduced model in path analysis

| Model fit index | Good fit threshold levels | Model fit statistic value |
|-----------------|---------------------------|---------------------------|
| <b>RMSEA</b>    | < 0.100                   | 0.031                     |
| <b>SRMR</b>     | < 0.050                   | 0.003                     |
| <b>GFI</b>      | > 0.900                   | 0.998                     |
| <b>AGFI</b>     | > 0.900                   | 0.988                     |
| <b>NNFI</b>     | > 0.900                   | 0.988                     |
| <b>CFI</b>      | > 0.900                   | 0.994                     |

Abbreviation: RMSEA = Root Mean Square Error Approximation; SRMR = Standardized Root Mean Square Residual; GFI = Goodness of Fit; AGFI = Adjusted Goodness of Fit; NNFI = Non-normed Fit Index; CFI = Comparative Fit Index.

**Supplementary Table 4.** Associations of anemia and renal function measures with the risk of DR based on observed data<sup>§</sup> (n = 1070)

| Variables <sup>  </sup>   | N    | NPDR(n=276) |                       |              | PDR(n=80) |                       |                   |
|---------------------------|------|-------------|-----------------------|--------------|-----------|-----------------------|-------------------|
|                           |      | n (%)       | Adjusted OR (95% CI)* | P-value      | n (%)     | Adjusted OR (95% CI)* | P-value           |
| Anemia <sup>†</sup>       |      |             |                       |              |           |                       |                   |
| -                         | 932  | 231(24.8)   | ref                   |              | 52(5.6)   | ref                   |                   |
| +                         | 138  | 45(32.6)    | 1.73(1.09, 2.74)      | <b>0.020</b> | 28(20.3)  | 4.01(2.16, 7.44)      | <b>&lt; 0.001</b> |
| DKD severity <sup>‡</sup> |      |             |                       |              |           |                       |                   |
| low/medium                | 843  | 205(24.3)   | ref                   |              | 45(5.3)   | ref                   |                   |
| high/very high            | 227  | 71(31.3)    | 1.38(0.95, 2.01)      | 0.089        | 35(15.4)  | 2.51(1.44, 4.39)      | <b>0.001</b>      |
| eGFR <sup>‡</sup>         |      |             |                       |              |           |                       |                   |
| ≥ 60                      | 1026 | 263(25.6)   | ref                   |              | 70(6.8)   | ref                   |                   |
| < 60                      | 44   | 13(29.6)    | 1.14(0.51, 2.51)      | 0.752        | 10(22.7)  | 2.34(0.90, 6.08)      | 0.083             |
| UACR <sup>‡</sup>         |      |             |                       |              |           |                       |                   |
| ≤ 300                     | 855  | 207(24.2)   | ref                   |              | 45(5.3)   | ref                   |                   |
| > 300                     | 215  | 69(32.1)    | 1.49(1.02, 2.18)      | <b>0.040</b> | 35(16.3)  | 2.78(1.59, 4.85)      | <b>&lt; 0.001</b> |

Abbreviation: DR = diabetic retinopathy; NPDR = non-proliferative diabetic retinopathy; PDR = proliferative diabetic retinopathy; DKD = diabetic kidney disease; eGFR = estimated glomerular filtration rate; UACR = urine albumin-to-creatinine ratio. \* Adjusted for age, sex, duration of diabetes, BMI, HbA1c, hypertension, hyperlipidemia, medication on diabetes. † Additionally adjusted for DKD; ‡ Additionally adjusted for anemia; §These 4 variables were analyzed separately. || Units of variables: eGFR in ml/min/1.73m<sup>2</sup>; UACR in mg/g.

**Supplementary Table 5.** The joint effects of anemia and renal function indexes with the risk of DR based on observed data without imputation<sup>§</sup> (n = 1070)

| Variables <sup>‡</sup> |        | N   | NPDR (n=276) |                       |                      | PDR (n=80) |                       |                      |
|------------------------|--------|-----|--------------|-----------------------|----------------------|------------|-----------------------|----------------------|
|                        |        |     | n (%)        | Adjusted OR (95% CI)* | P-value <sup>§</sup> | n (%)      | Adjusted OR (95% CI)* | P-value <sup>§</sup> |
| DKD                    | anemia |     |              |                       |                      |            |                       |                      |
| low/medium             | -      | 775 | 188(24.3)    | ref                   |                      | 37(4.8)    | ref                   |                      |
| high/very high         | -      | 157 | 43(27.4)     | 1.20(0.79, 1.83)      | 0.393                | 15(9.6)    | 2.23(1.14, 4.36)      | <b>0.019</b>         |
| low/medium             | +      | 68  | 17(25.0)     | 1.28(0.69, 2.38)      | 0.428                | 8(11.8)    | 3.21(1.33, 7.76)      | <b>0.010</b>         |
| high/very high         | +      | 70  | 28(40.0)     | 3.15(1.66, 5.98)      | <b>&lt; 0.001</b>    | 20(28.6)   | 12.27(5.62, 26.76)    | <b>&lt; 0.001</b>    |
| <b>P for trend</b>     |        |     |              |                       | <b>0.001</b>         |            |                       | <b>&lt; 0.001</b>    |
| eGFR                   | anemia |     |              |                       |                      |            |                       |                      |
| ≥ 60                   | -      | 914 | 228(25.0)    | ref                   |                      | 50(5.5)    | ref                   |                      |
| < 60                   | -      | 18  | 3(16.7)      | 0.65(0.17, 2.49)      | 0.533                | 2(11.1)    | 2.87(0.58, 14.18)     | 0.195                |
| ≥ 60                   | +      | 112 | 35(31.3)     | 1.70(1.05, 2.76)      | <b>0.032</b>         | 20(17.9)   | 4.63(2.43, 8.83)      | <b>&lt; 0.001</b>    |
| < 60                   | +      | 26  | 10(38.5)     | 2.80(1.03, 7.61)      | <b>0.044</b>         | 8(30.8)    | 11.62(3.76, 35.88)    | <b>&lt; 0.001</b>    |
| <b>P for trend</b>     |        |     |              |                       | <b>0.007</b>         |            |                       | <b>&lt; 0.001</b>    |
| UACR                   | anemia |     |              |                       |                      |            |                       |                      |
| ≤ 300                  | -      | 785 | 188(24.0)    | ref                   |                      | 37(4.7)    | ref                   |                      |
| > 300                  | -      | 147 | 43(29.3)     | 1.37(0.89, 2.10)      | 0.149                | 15(10.2)   | 2.49(1.27, 4.88)      | <b>0.008</b>         |
| ≤ 300                  | +      | 70  | 19(27.1)     | 1.44(0.79, 2.63)      | 0.229                | 8(11.4)    | 3.23(1.34, 7.81)      | <b>0.009</b>         |
| > 300                  | +      | 68  | 26(38.2)     | 3.00(1.56, 5.74)      | <b>0.001</b>         | 20(29.4)   | 12.42(5.70, 27.07)    | <b>&lt; 0.001</b>    |
| <b>P for trend</b>     |        |     |              |                       | <b>0.001</b>         |            |                       | <b>&lt; 0.001</b>    |

Abbreviation: DR = diabetic retinopathy; NPDR = non-proliferative diabetic retinopathy; PDR = proliferative diabetic retinopathy; DKD = diabetic kidney disease; eGFR = estimated glomerular filtration rate; UACR = urine albumin-to-creatinine ratio. \* Adjusted for age, sex, duration of diabetes, BMI, HbA1c, hypertension, hyperlipidemia, medication on diabetes. † The 4 variables were analyzed separately. ‡ Units of variables: SCr in μmol/L; BUN in mmol/L; eGFR in ml/min/1.73m<sup>2</sup>; UACR in mg/g. § All p for multiplicative interaction > 0.05.

## Interaction

Using the PDR & no anemia as the imaging reference line, the PDR & anemia is not completely parallel to the PDR & no anemia. When patients with both high risk of DKD and anemia, the prevalence of PDR is greater than the sum of prevalence in patients only with anemia or high DKD risk.

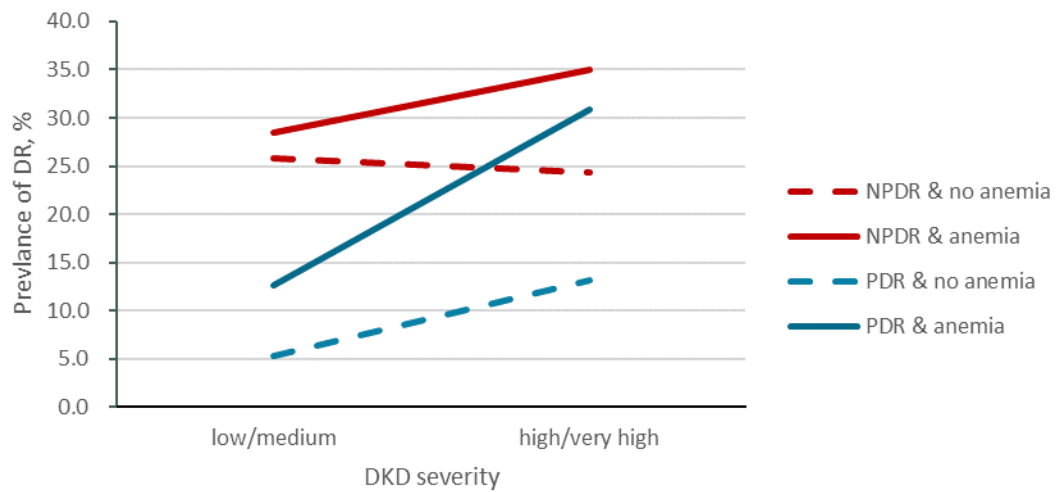

**Supplementary Figure 4.** Prevalence of DR by DKD severity and anemia. Abbreviation: DR = diabetic retinopathy; NPDR = non-proliferative diabetic retinopathy; PDR = proliferative diabetic retinopathy; DKD = diabetic kidney disease
